# Supplementary material for: Recovery of Protein from Industrial Hemp Waste (Cannabis sativa, L.) Using High-Pressure Processing and Ultrasound Technologies
Source: MDPI journal article supplement (doi:10.3390/foods12152883), 2023-07-29
Supplement: s1 [file s1]

**Table S1.** Amino acid composition of protein extracts generated from hempseed cake using different combinations of high-pressure processing (HPP) pre-treatments (time and pressure) and extraction methods (conventional extraction (CE), and ultrasound-assisted extraction (UAE)). Results are expressed as average  $\pm$  standard error of the mean (SEM) (n=4).

| HPP pre-treatments             |                |               |              |             |                |               |              |             |                |                |              |             |                |                |
|--------------------------------|----------------|---------------|--------------|-------------|----------------|---------------|--------------|-------------|----------------|----------------|--------------|-------------|----------------|----------------|
| Control (no HPP pre-treatment) |                |               | 200 MPa      |             |                |               | 400 MPa      |             |                |                | 600 MPa      |             |                |                |
| AA                             | Extraction     |               | HPP<br>(min) | AA          | Extraction     |               | HPP<br>(min) | AA          | Extraction     |                | HPP<br>(min) | AA          | Extraction     |                |
|                                | CE             | UAE           |              |             | CE             | UAE           |              |             | CE             | UAE            |              |             | CE             | UAE            |
| Ala                            | 29.63±0.35     | 37.99±0.41    | 4            | Ala         | 29.02±0.30     | 35.82±0.23    | 4            | Ala         | 29.87±0.40     | 34.10±0.61     | 4            | Ala         | 28.62±1.07     | 37.53±1.47     |
| Arg                            | 73.42±2.08     | 85.42±1.15    |              | Arg         | 71.23±2.27     | 80.75±0.29    |              | Arg         | 68.31±3.19     | 68.68±2.04     |              | Arg         | 68.56±3.75     | 81.43±3.02     |
| Asx                            | 77.63±2.67     | 96.46±0.63    |              | Asx         | 76.96±1.63     | 86.19±0.50    |              | Asx         | 72.66±0.98     | 82.09±4.64     |              | Asx         | 70.25±3.74     | 92.72±3.37     |
| Glx                            | 129.40±3.50    | 154.16±1.02   |              | Glx         | 124.44±2.67    | 146.26±0.57   |              | Glx         | 122.32±5.98    | 132.46±4.64    |              | Glx         | 119.07±7.23    | 154.03±10.22   |
| Gly                            | 29.04±0.47     | 36.53±0.43    |              | Gly         | 28.27±0.50     | 35.03±0.28    |              | Gly         | 29.21±0.60     | 33.07±0.61     |              | Gly         | 28.44±1.15     | 35.43±1.26     |
| His                            | 16.08±0.59     | 20.73±0.46    |              | His         | 15.97±0.27     | 18.82±0.06    |              | His         | 15.22±0.22     | 17.67±0.69     |              | His         | 14.60±0.76     | 19.69±0.84     |
| Ile                            | 22.71±0.62     | 28.68±0.82    |              | Ile         | 23.06±0.42     | 26.35±0.38    |              | Ile         | 22.07±0.40     | 26.03±0.75     |              | Ile         | 21.35±1.07     | 28.99±1.41     |
| Leu                            | 45.72±0.61     | 57.16±0.56    |              | Leu         | 44.62±0.32     | 54.98±0.26    |              | Leu         | 45.74±0.53     | 52.33±1.04     |              | Leu         | 43.86±1.78     | 56.61±2.42     |
| Lys                            | 13.84±0.19     | 19.59±0.29    |              | Lys         | 13.34±0.14     | 19.85±0.19    |              | Lys         | 14.11±0.30     | 18.15±0.05     |              | Lys         | 13.56±0.57     | 19.56±0.60     |
| Met                            | 2.84±0.06      | 5±1.19        |              | Met         | 3.25±0.25      | 6.87±0.29     |              | Met         | 3.63±0.15      | 6.08±0.98      |              | Met         | 2.62±0.12      | 6.07±0.32      |
| Phe                            | 31.37±0.69     | 38.85±0.41    |              | Phe         | 31.01±0.38     | 36.15±0.10    |              | Phe         | 30.11±0.54     | 34.47±1.06     |              | Phe         | 28.75±1.60     | 38.51±1.66     |
| Pro                            | 22.16±3.65     | 32.36±2.11    |              | Pro         | 21.44±3.92     | 31.01±1.64    |              | Pro         | 26.15±0.85     | 30.66±1.30     |              | Pro         | 22.84±5.10     | 28.68±3.63     |
| Ser                            | 33.93±0.68     | 42.11±0.39    |              | Ser         | 32.92±0.68     | 40.02±0.27    |              | Ser         | 32.68±1.09     | 35.16±0.90     |              | Ser         | 32.03±1.42     | 40.35±1.39     |
| Thr                            | 19.94±0.64     | 24.72±0.52    |              | Thr         | 19.66±0.40     | 22.90±0.17    |              | Thr         | 19.07±0.41     | 19.84±0.56     |              | Thr         | 18.40±0.91     | 23.69±0.85     |
| Trp                            | 1.39±0.08      | 2.44±0.19     |              | Trp         | 1.15±0.26      | 2.13±0.06     |              | Trp         | 1.41±0.20      | 1.75±0.15      |              | Trp         | 0.96±0.14      | 1.79±0.42      |
| Tyr                            | 25.41±0.56     | 31.80±0.31    |              | Tyr         | 24.69±0.20     | 29.63±0.05    |              | Tyr         | 24.49±0.51     | 28.18±0.74     |              | Tyr         | 23.43±1.23     | 31.29±1.42     |
| Val                            | 30.71±0.84     | 38.52±0.80    |              | Val         | 30.62±0.30     | 35.00±0.34    |              | Val         | 29.78±0.58     | 35.24±1.24     |              | Val         | 28.57±1.46     | 39.09±1.82     |
| EAA                            | 184.61±4.02 b  | 235.70±2.11 a |              | EAA         | 182.68±2.41 b  | 223.03±0.30 a |              | EAA         | 181.14±2.42 b  | 211.56±6.44 a  |              | EAA         | 172.68±7.87 b  | 234.00±10.23 a |
| CEAA                           | 150.03±4.22 b  | 186.11±2.39 a |              | CEAA        | 145.62±6.17 b  | 176.43±1.96 a |              | CEAA        | 148.15±3.69 b  | 160.59±3.36 a  |              | CEAA        | 143.28±9.56 b  | 176.82±8.72 a  |
| NEAA                           | 270.58±6.52 b  | 330.71±1.86 a |              | NEAA        | 263.35±3.90 b  | 308.28±1.43 a |              | NEAA        | 257.53±8.19 a  | 283.80±9.44 a  |              | NEAA        | 249.97±13.11 b | 324.63±16.43 a |
| TAA                            | 605.22±11.34 b | 752.52±5.38 a |              | TAA         | 591.65±9.61 b  | 707.74±2.78 a |              | TAA         | 586.82±13.20 b | 655.95±19.04 a |              | TAA         | 565.93±29.11 b | 735.46±35.09 a |
| EAA/TAA (%)                    | 30.50±0.29 a   | 31.32±0.20 a  |              | EAA/TAA (%) |                |               |              | EAA/TAA (%) |                |                |              | EAA/TAA (%) |                |                |
|                                | 30.50±0.29 a   | a             |              |             | 30.89 ± 0.53 a | 31.51±0.14 a  |              |             | 30.90±0.53 a   | 32.25±0.12 a   |              |             | 30.55±0.53 a   | 31.84±0.21 a   |
| Arg/Lys                        | 5.30±0.10 a    | 4.36±0.08 b   | Arg/Lys      | 5.34±0.21 a | 4.07±0.03 b    | Arg/Lys       | 4.84±0.19 a  | 3.78±0.11 b | Arg/Lys        | 5.06±0.17 a    | 4.16±0.09 b  |             |                |                |

|   |             |               |               |   |             |                |               |   |             |                |                |
|---|-------------|---------------|---------------|---|-------------|----------------|---------------|---|-------------|----------------|----------------|
| 8 | Ala         | 28.55±0.24    | 34.58±0.19    | 8 | Ala         | 28.30±0.70     | 34.85±0.64    | 8 | Ala         | 27.97±0.62     | 35.34±1.36     |
|   | Arg         | 68.31±1.53    | 71.03±1.49    |   | Arg         | 68.20±3.22     | 71.64±1.59    |   | Arg         | 67.73±2.25     | 74.88±3.86     |
|   | Asx         | 71.08±0.96    | 81.74±1.03    |   | Asx         | 70.61±2.25     | 83.10±3.22    |   | Asx         | 70.36±2.55     | 88.02±4.54     |
|   | Glx         | 119.11±2.15   | 134.54±0.62   |   | Glx         | 119.55±6.83    | 136.50±3.27   |   | Glx         | 117.63±2.98    | 143.92±8.55    |
|   | Gly         | 27.77±0.25    | 33.84±0.25    |   | Gly         | 28.29±0.61     | 33.23±0.36    |   | Gly         | 27.24±0.66     | 34.41±1.04     |
|   | His         | 14.97±0.13    | 17.87±0.15    |   | His         | 14.92±0.62     | 18.02±0.33    |   | His         | 14.68±0.39     | 18.58±0.79     |
|   | Ile         | 21.98±0.23    | 25.65±0.13    |   | Ile         | 21.34±0.58     | 26.44±0.49    |   | Ile         | 21.55±0.52     | 26.58±1.52     |
|   | Leu         | 44.14±0.30    | 53.11±0.22    |   | Leu         | 43.48±1.30     | 53.48±0.72    |   | Leu         | 43.13±0.94     | 54.04±2.29     |
|   | Lys         | 13.68±0.14    | 18.78±0.43    |   | Lys         | 13.55±0.30     | 18.41±0.44    |   | Lys         | 13.58±0.20     | 19.26±0.83     |
|   | Met         | 2.81±0.12     | 4.95±0.14     |   | Met         | 2.46±0.29      | 8.69±2.15     |   | Met         | 2.72±0.14      | 6.98±1.85      |
|   | Phe         | 29.78±0.23    | 34.63±0.33    |   | Phe         | 28.96±1.17     | 35.66±0.77    |   | Phe         | 29.25±0.61     | 35.81±1.91     |
|   | Pro         | 21.33±3.50    | 30.64±1.90    |   | Pro         | 25.31±1.35     | 24.02±3.70    |   | Pro         | 22.94±0.67     | 31.80±1.83     |
|   | Ser         | 31.57±0.48    | 36.18±0.83    |   | Ser         | 32.23±1.18     | 36.40±0.48    |   | Ser         | 31.46±0.77     | 38.71±1.65     |
|   | Thr         | 18.48±0.25    | 20.02±0.72    |   | Thr         | 18.75±0.64     | 20.71±0.40    |   | Thr         | 18.36±0.54     | 22.29±1.29     |
|   | Trp         | 1.02±0.15     | 2.01±0.02     |   | Trp         | 1.04±0.21      | 2.69±0.26     |   | Trp         | 1.11±0.10      | 1.98±0.28      |
|   | Tyr         | 23.98±0.23    | 28.36±0.26    |   | Tyr         | 23.33±0.95     | 28.80±0.67    |   | Tyr         | 23.47±0.44     | 29.39±1.43     |
|   | Val         | 29.37±0.28    | 34.01±0.30    |   | Val         | 28.63±0.71     | 35.45±0.61    |   | Val         | 28.70±0.55     | 35.72±2.10     |
|   | EAA         | 176.23±1.24 b | 211.03±1.97 a |   | EAA         | 173.14±5.41 b  | 219.56±3.66 a |   | EAA         | 173.08±3.65 b  | 221.24±12.76 a |
|   | CEAA        | 141.39±4.44 b | 163.87±2.81 a |   | CEAA        | 145.12±3.64 b  | 157.69±3.98 a |   | CEAA        | 141.38±4.00 b  | 170.47±7.08 a  |
|   | NEAA        | 250.31±3.67 b | 287.04±2.12 a |   | NEAA        | 250.69±10.94 b | 290.88±7.47 a |   | NEAA        | 247.42±6.50 b  | 305.99±16.06 a |
| 8 | TAA         | 567.94±7.25 b | 661.94±6.48 a | 8 | TAA         | 568.96±19.64 b | 668.13±9.60 a | 8 | TAA         | 561.88±14.07 b | 697.70±35.80 a |
|   | EAA/TAA (%) | 31.04±0.32 a  | 31.88±0.13 a  |   | EAA/TAA (%) | 30.45±0.30 b   | 32.86±0.23 a  |   | EAA/TAA (%) | 30.81±0.14 b   | 31.68±0.21 a   |
|   | Arg/Lys     | 4.99±0.07 a   | 3.78±0.01 b   |   | Arg/Lys     | 5.03±0.13 a    | 3.89±0.05 b   |   | Arg/Lys     | 4.99±0.12 a    | 3.88±0.06 b    |
|   |             |               |               |   |             |                |               |   |             |                |                |

Different lower-case letters indicate statistical differences (P<0.05) amongst samples extracted following CE and UAE conditions within each pre-treatment condition used. Abberviations in the table are as follows: EAA (essential amino acids), CEAA (conditionally essential amino acids), NEAA (non-essential amino acids) and TAA (total amino acids).
